# Supplementary material for: Highly conductive hydrogel sensors driven by amylose with freezing and dehydration resistances
Source: Royal Society of Chemistry journal article supplement (doi:10.1039/d2tc02205b), 2022-01-01
Supplement: d2tc02205b1.pdf [file d2tc02205b1.pdf]

## Supporting information

# Highly conductive hydrogel sensor driven by amylose with freezing and dehydration resistance

Yiyan Gao, Yang Gao, Zhixin Zhang, Yuanrui Wang, Xiuyan Ren, Fei Jia \*,

Guanghui Gao \*

Polymeric and Soft Materials Laboratory, School of Chemical Engineering, Advanced

Institute of Materials Science, Changchun University of Technology, Changchun,

130012, P. R. China

E-mail: [jiafei@ccut.edu.cn](mailto:jiafei@ccut.edu.cn); [ghgao@ccut.edu.cn](mailto:ghgao@ccut.edu.cn)

**TableS1.** Recipes of all hydrogel samples

| <b>Hydrogels</b>           | PVA<br>(g) | NaCl<br>(g) | Amylose<br>(g) | Glycerol<br>(mL) | Deionized<br>water (mL) | water contents<br>(%) |
|----------------------------|------------|-------------|----------------|------------------|-------------------------|-----------------------|
| <b>PVA-NaCl</b>            | 6.5        | 2           | 0              | 0                | 40                      | 100%                  |
| <b>PVA-NaCl-GL</b>         | 6.5        | 2           | 0              | 12               | 28                      | 70%                   |
| <b>PVA-NaCl-GL-AMY-1%</b>  | 6.5        | 2           | 0.4            | 12               | 28                      | 70%                   |
| <b>PVA-NaCl-GL-AMY-2%</b>  | 6.5        | 2           | 0.8            | 12               | 28                      | 70%                   |
| <b>PVA-NaCl-GL-AMY-3%</b>  | 6.5        | 2           | 1.2            | 12               | 28                      | 70%                   |
| <b>PVA-NaCl-AMY</b>        | 6.5        | 2           | 1.2            | 0                | 40                      | 100%                  |
| <b>PVA-NaCl-GL-15%-AMY</b> | 6.5        | 2           | 1.2            | 6                | 34                      | 85%                   |
| <b>PVA-NaCl-GL-30%-AMY</b> | 6.5        | 2           | 1.2            | 12               | 28                      | 70%                   |

Table S2. Comparison of the hydrogel with the other hydrogels in the available literature

| Hydrogel                                        | Stress (kPa) | Strain (%) | Sensitivity (GF) | Anti-drying (%)  | Anti-freezing (°C) | References |
|-------------------------------------------------|--------------|------------|------------------|------------------|--------------------|------------|
| MCT-fabric                                      | -            | 210        | 9022             | -                | -                  | 42         |
| AgNW/CNF hybrid nanopaper                       | 68700        | 1.87       | 0.24             | -                | -                  | 43         |
| PINF/MXene composite aerogel.                   | 85.21        | 90         | 1.67             | -                | -50                | 44         |
| superhydrophobic conductive MXene/paper         | -            | -          | 17.4             | superhydrophobic | -                  | 45         |
| Amy/(PAAm-AAc) hydrogels                        | 100          | 1100       | 6.93             | -                | -                  | 46         |
| HPMC-g-AN/AM0.6-ZnCl <sub>2</sub> -25% hydrogel | 160          | 1730       | -                | -                | -                  | 47         |
| Gel-C5 hydrogel                                 | 41           | 436        | 5.9              | -                | -                  | 48         |
| PVA-NaCl-GL-AMY hydrogel                        | 1377         | 706        | 2.55             | 85               | -20                | This work  |

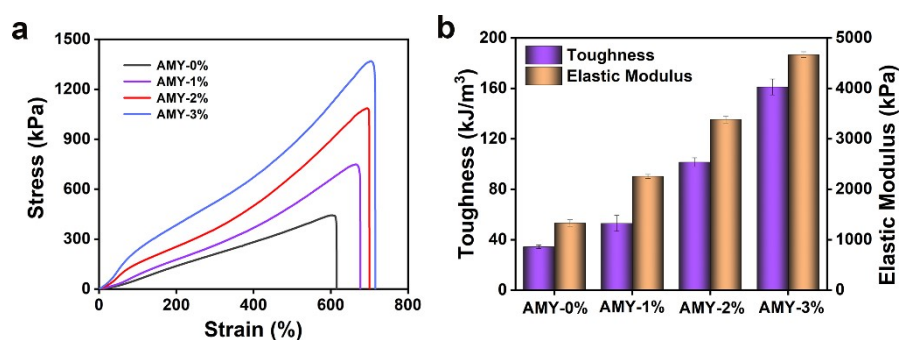

**Figure S1.** a) Tensile curves of hydrogel with diverse amylose contents; b) the influence of amylose contents on the elastic modulus and toughness for hydrogels.

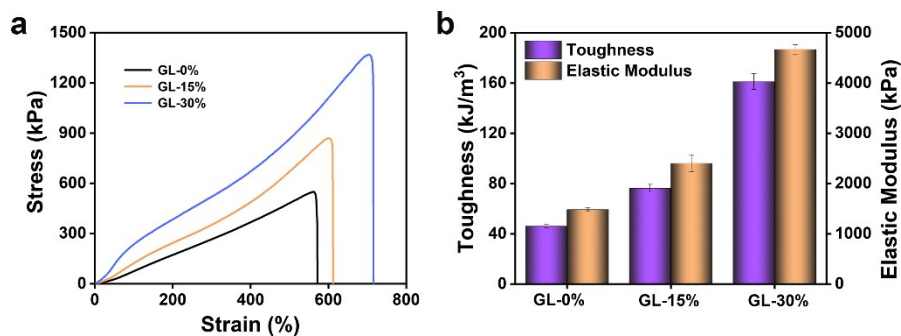

**Figure S2.** a) Tensile curves of hydrogel with diverse glycerol contents; b) the influence of glycerol contents on the elastic modulus and toughness for hydrogels.

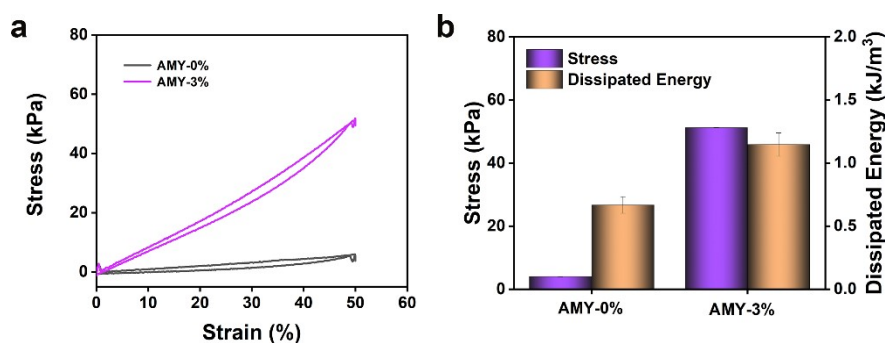

**Figure S3.** a) Loading-unloading curves of PVA-NaCl-GL-AMY hydrogel; b) the influence of amylose contents on the dissipated energy and maximum stress for hydrogels.

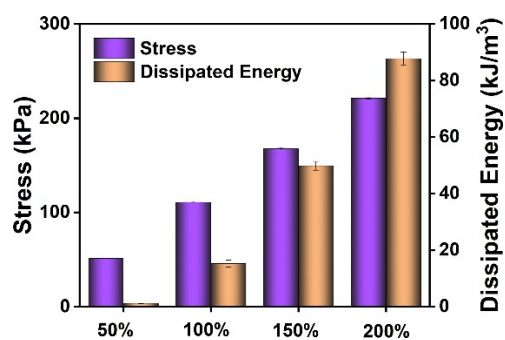

**Figure S4.** Different tensile strain on the dissipated energy and maximum stress for hydrogels.

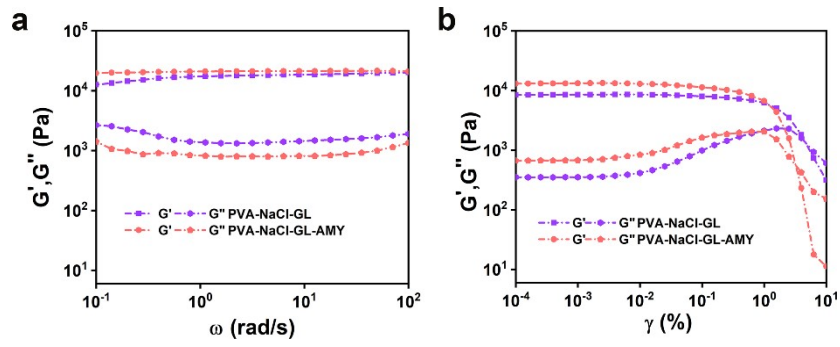

**Figure S5.** a) The rheological of the PVA-NaCl-GL-AMY hydrogel at diverse strains;  
 b) the rheological of the PVA-NaCl-GL-AMY hydrogel with various frequency.

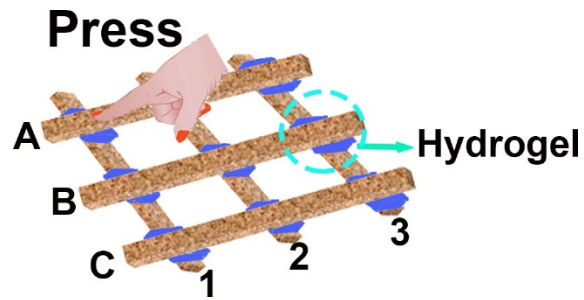

**Figure S6.** The  $3 \times 3$  array sensor of PVA-NaCl-GL-AMY hydrogel.
